# Supplementary material
Source: PubMed Central journal article supplement (PMC5811314)

# Supplementary Figure 3

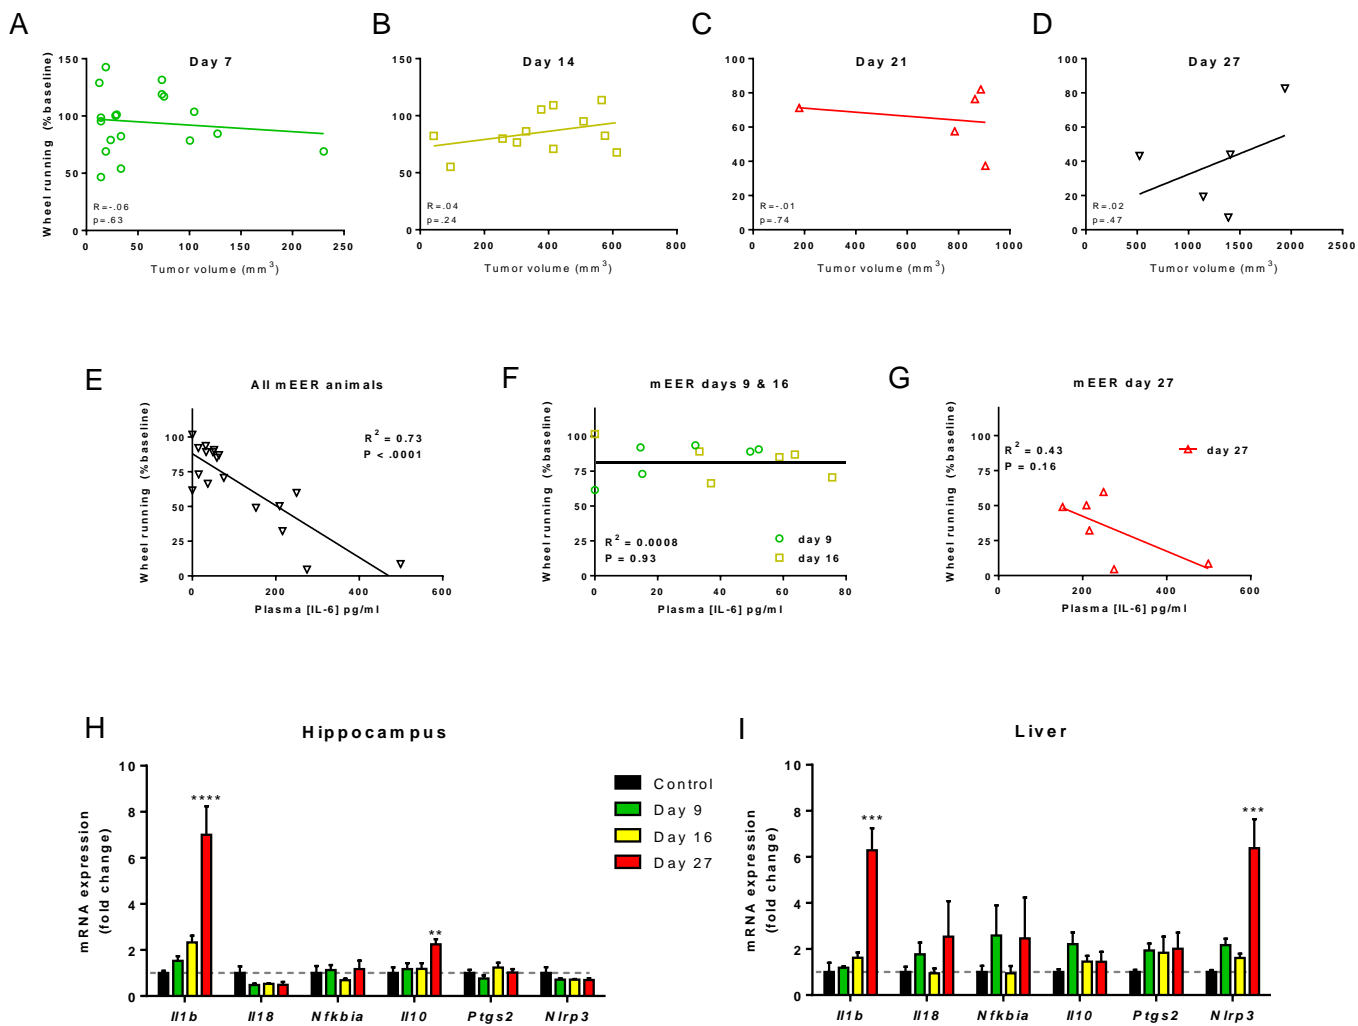

Supplement: NIHMS925034-supplement-4.pdf [file NIHMS925034-supplement-4.pdf]
